# Supplementary material for: Collagen-decorated electrospun scaffolds of unsaturated copolyesters for bone tissue regeneration
Source: Royal Society of Chemistry journal article supplement (doi:10.1039/d3tb02665e), 2024-01-01
Supplement: d3tb02665e1.pdf [file d3tb02665e1.pdf]

## SUPPLEMENTARY INFORMATION

### Collagen-decorated electrospun scaffolds of unsaturated copolyesters for bone tissue regeneration

Heloísa Bremm Madalosso,<sup>a</sup> Camila Guindani,<sup>b</sup> Bianca Chieregato Maniglia,<sup>c</sup> Pedro Henrique Hermes de Araújo,<sup>a</sup> Claudia Sayer<sup>a\*</sup>

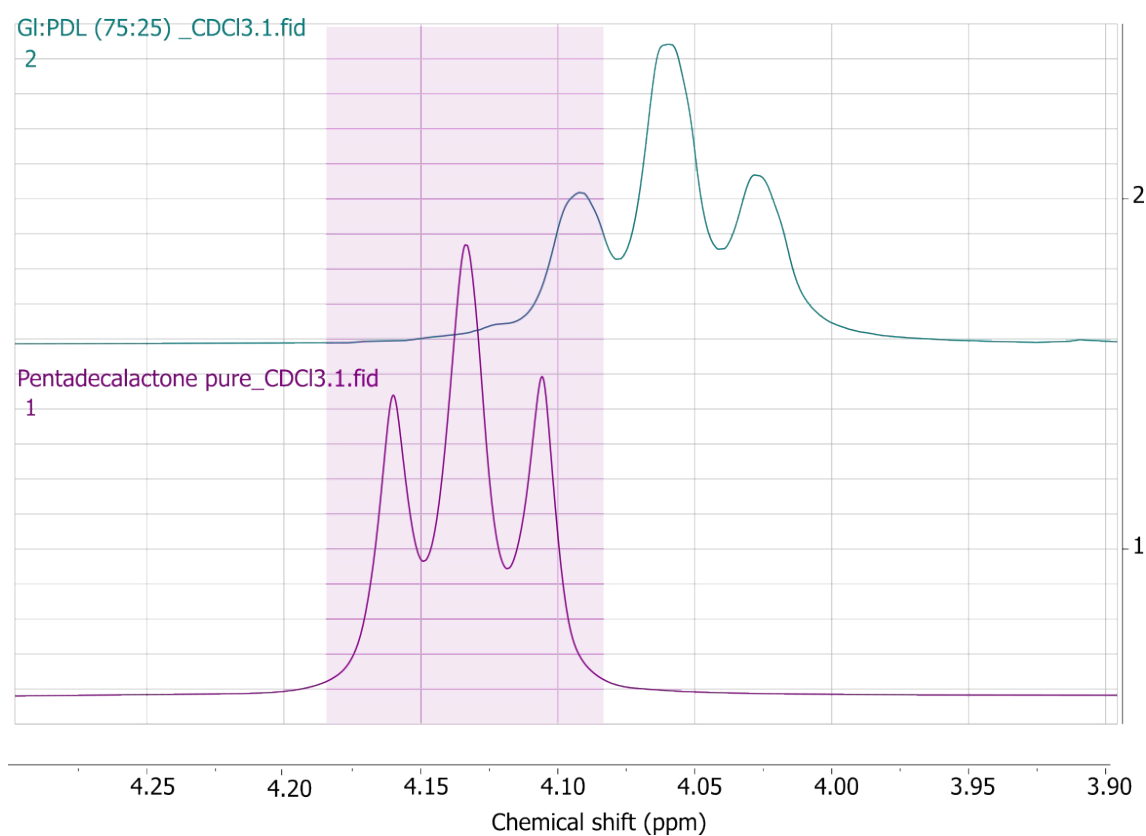

**Figure S1.** Estimation of monomer conversion: comparison between NMR spectrum (methylene peak) of the monomer pentadecalactone and the copolymer GI: PDL (75:25).

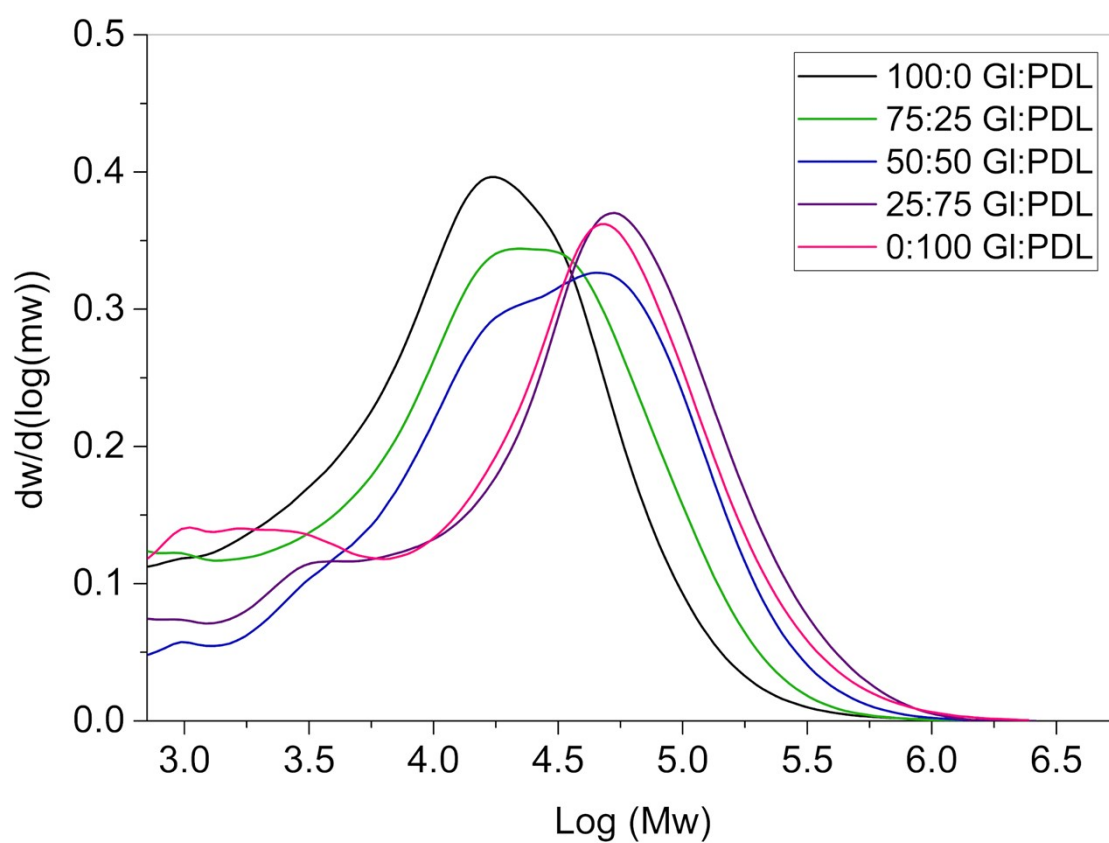

**Figure S2.** Effect of the comonomer composition in the formulation on the molecular weight distribution of the copolymer

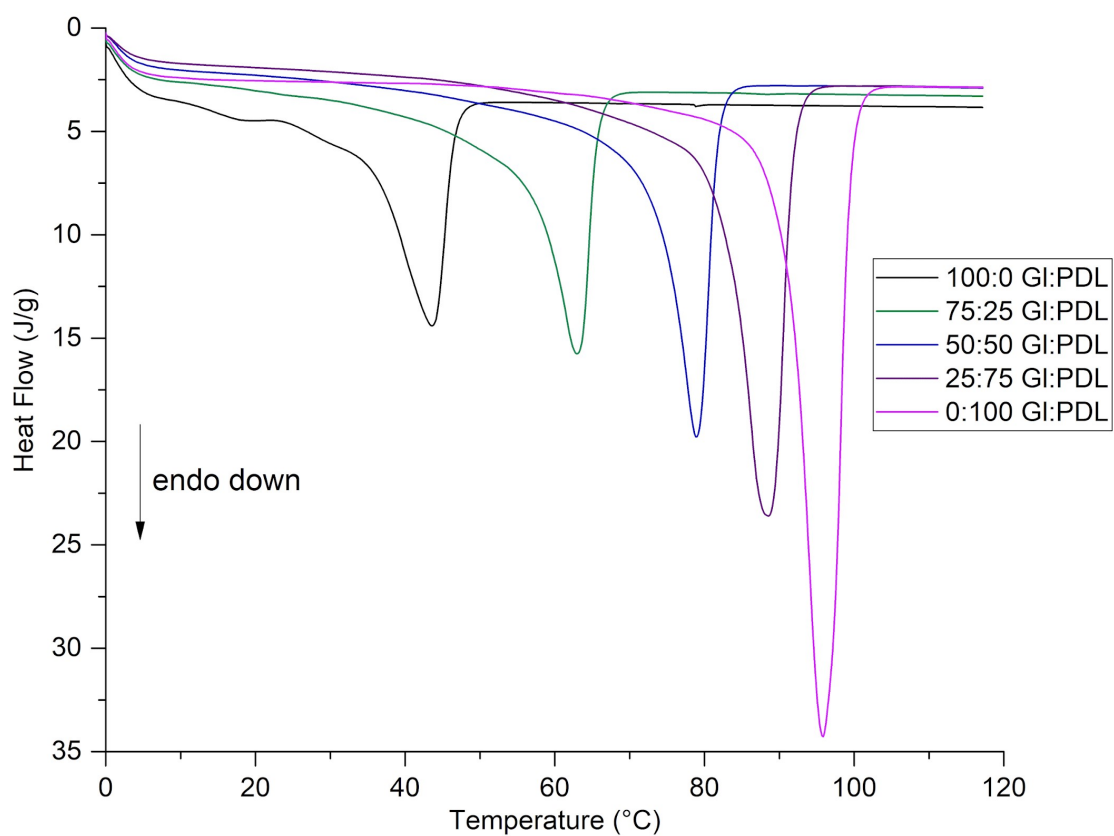

**Figure S3.** Thermograms of the second heating run of PGI/PDL copolymer at different monomer ratios

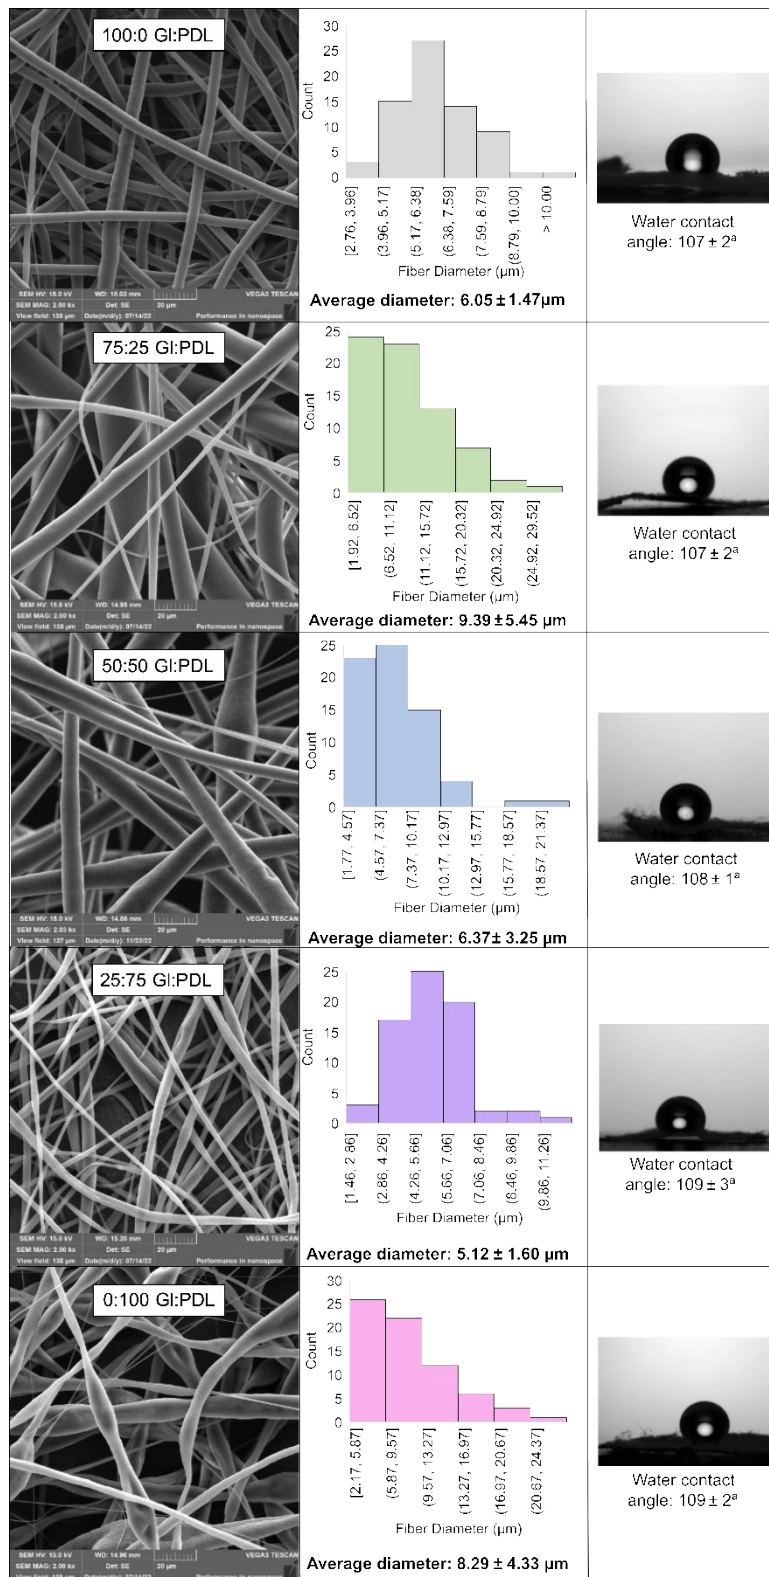

**Figure S4.** Fiber morphology, diameter distribution, and wettability varying with different monomer ratios. SEM images were taken with a magnification of 2k. Concentration for fiber conformation: 25 wt% for samples 1, 2 and 3; 15 wt% for samples 4 and 5. a-c: Different letters indicate a statistically significant difference between the samples (Tuckey,  $p < 0.05$ )

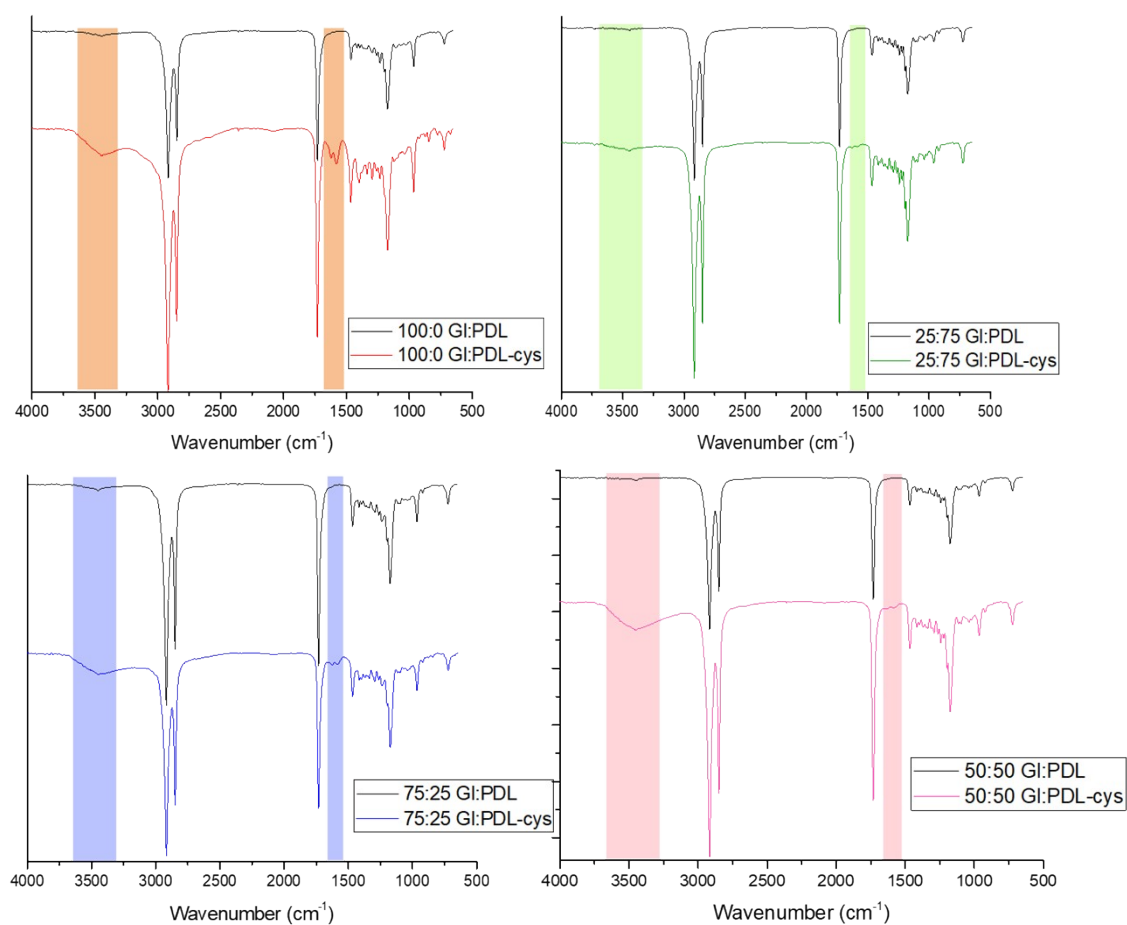

**Figure S5.** ATR spectrum of PGIPDL copolymer fibers functionalized with cysteine

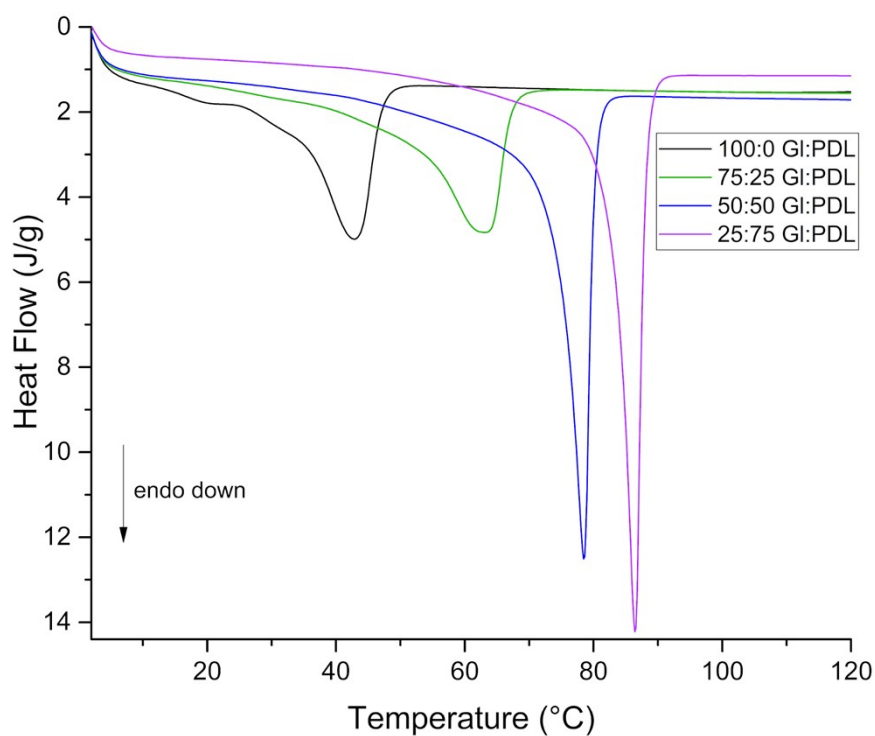

**Figure S6.** Thermograms of PGIPDL-cysteine scaffolds

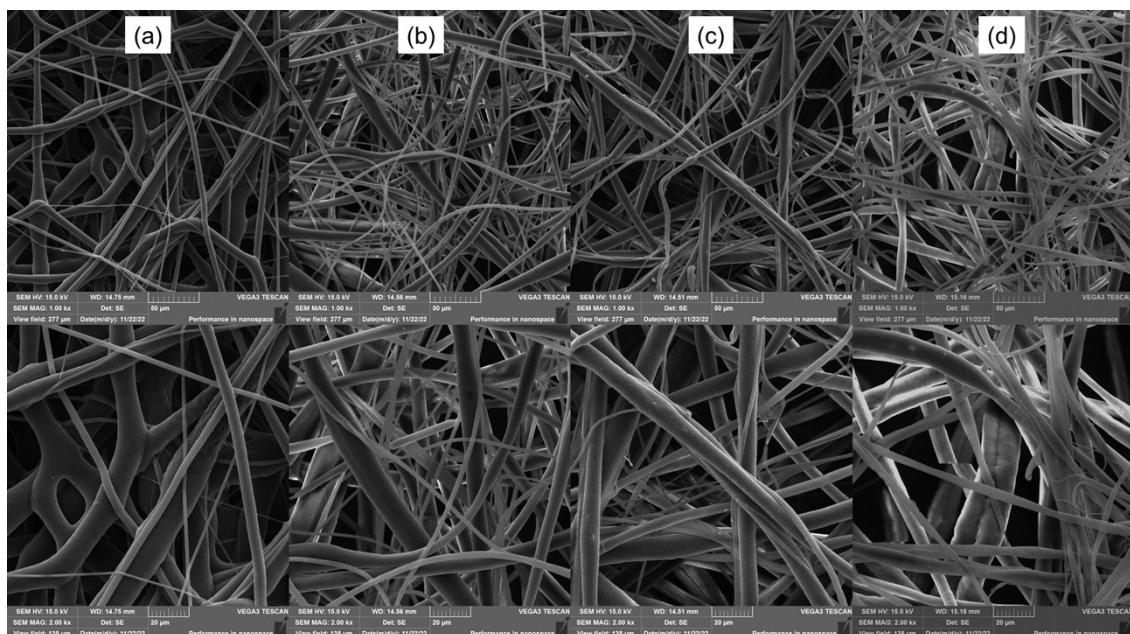

**Figure S7.** SEM images of electrospun fibers from PGIPDL-cys at Gl:PDL ratios of (a) 100:0, (b) 75:25, (c) 50:50, and (d) 25:75. Vertically, the images have been enlarged from 1000 to 2000 times.

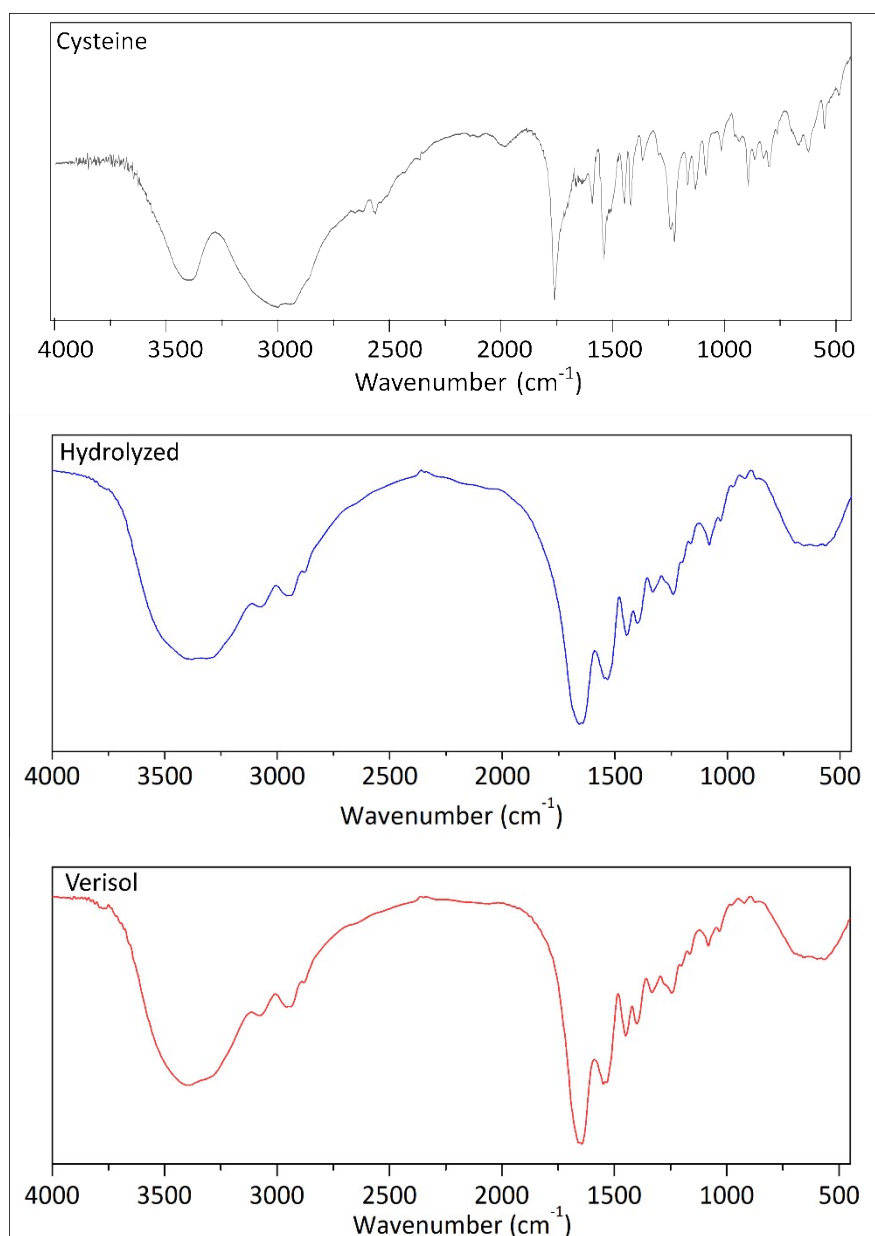

**Figure S8.** ATR-FTIR spectra of cysteine, hydrolyzed and Verisol<sup>®</sup> collagens.
